# Supplementary material for: Towards a Rational Design of a Continuous-Flow Method for the Acetalization of Crude Glycerol: Scope and Limitations of Commercial Amberlyst 36 and AlF3·3H2O as Model Catalysts
Source: Molecules. 2016 May 18;21(5):657. doi: 10.3390/molecules21050657 (PMC6274036; doi:10.3390/molecules21050657)
Supplement: Supplementary file 1 [file molecules-21-00657-s001.pdf]

# Supplementary Materials: Towards a Rationale Design of a Continuous-Flow Method for the Acetalization of Crude Glycerol: Scope and Limitations of Commercial Amberlyst 36 and $\text{AlF}_3 \cdot 3\text{H}_2\text{O}$ as Model Catalysts

Sandro Guidi, Marco Noè, Pietro Riello, Alvise Perosa and Maurizio Selva

## ICP Analysis

ICP-OES analyses were carried out to evaluate the leaching of Al from the catalytic bed of commercial  $\text{AlF}_3 \cdot 3\text{H}_2\text{O}$  used in this investigation. Analyses were run on a Perkin Elmer Optima 5300 DV in axial direction at 394.401 nm. A calibration curve was obtained by using seven aqueous solutions containing 300, 200, 150, 100, 60, 40 and 20 ppb of Al. These solutions were all prepared by dilution of a 1000 mg/L standard solution of ionic Al in  $\text{HNO}_3$ . The linear fit was automatically calculated by the ICP software resulting with intercept =  $-151.8$ , slope =  $21.70$  and correlation coefficient =  $0.996961$ .

A total of three samples were considered for Al-analyses. They were obtained according to the procedure described in the experimental section. The first two samples (A and B) derived from the reaction of **Glyc3** and **Glyc4** (see Table 1, main text) with acetone catalyzed by  $\text{AlF}_3 \cdot 3\text{H}_2\text{O}$ . While, the third one was prepared by flowing the reactants glycerol (**Glyc3**) and acetone through the CF-apparatus in the absence of the catalyst (Blank).

Before any measure, each sample was first diluted with milli-Q water (20 mL). A and B were then diluted again in a 1:3 *v/v* ratio. Table S1 reports the results. Each analysis was the average of 6 subsequent acquisitions.

Table S1. ICP-OES analyses of the Al content.

| Entry | Sample | Reactant     | Al Content ( $\mu\text{g/L}$ ) |
|-------|--------|--------------|--------------------------------|
| 1     | A      | <b>Glyc3</b> | 214.0                          |
| 2     | B      | <b>Glyc4</b> | 188.1                          |
| 3     | Blank  | <b>Glyc3</b> | 137.4                          |

## Ion Chromatography Analysis

Ion chromatography analyses were carried out to evaluate the leaching of  $\text{F}^-$  from the catalytic bed of  $\text{AlF}_3 \cdot 3\text{H}_2\text{O}$  used in this investigation. Analyses were run on a Dionex LC20 (Chromatography enclosure) equipped with a Dionex GP40 gradient pump and a Dionex ECD ED40 (working at 100 mA). A Dionex AS14 was used as column with 1mM carbonate/3.5 mM bicarbonate as a mobile phase. A calibration curve was obtained by using four aqueous solutions containing 0.5, 1, 3, 7 ppm of  $\text{F}^-$ . The linear fit was automatically calculated by the chromatograph control software (Chromeleon) resulting with slope =  $0.131$ , intercept forced to 0 and correlation coefficient =  $0.999868$ .

A total of two samples were considered for  $\text{F}^-$  analyses. They were obtained according to the procedure described in the experimental section. The first sample (A) was derived from the reaction of glycerol (**Glyc3**) with acetone catalyzed by  $\text{AlF}_3 \cdot 3\text{H}_2\text{O}$  while, the second one was prepared by flowing the reactants in the absence of the catalyst (blank).

Before any measure, each sample was first diluted with milli-Q water in a 1:5 *v/v* ratio. Table S1 reports the results. Each analysis was the average of 4 subsequent acquisitions.

**Table S2.** Ion chromatography analyses of the F<sup>-</sup> content.

| Entry | Sample | F <sup>-</sup> Content (mg/L) |
|-------|--------|-------------------------------|
| 1     | A      | 2.808                         |
| 2     | Blank  | 0.274                         |

**<sup>1</sup>H NMR Spectrum of 1c (1:1 Mixture of cis and Trans Isomers)**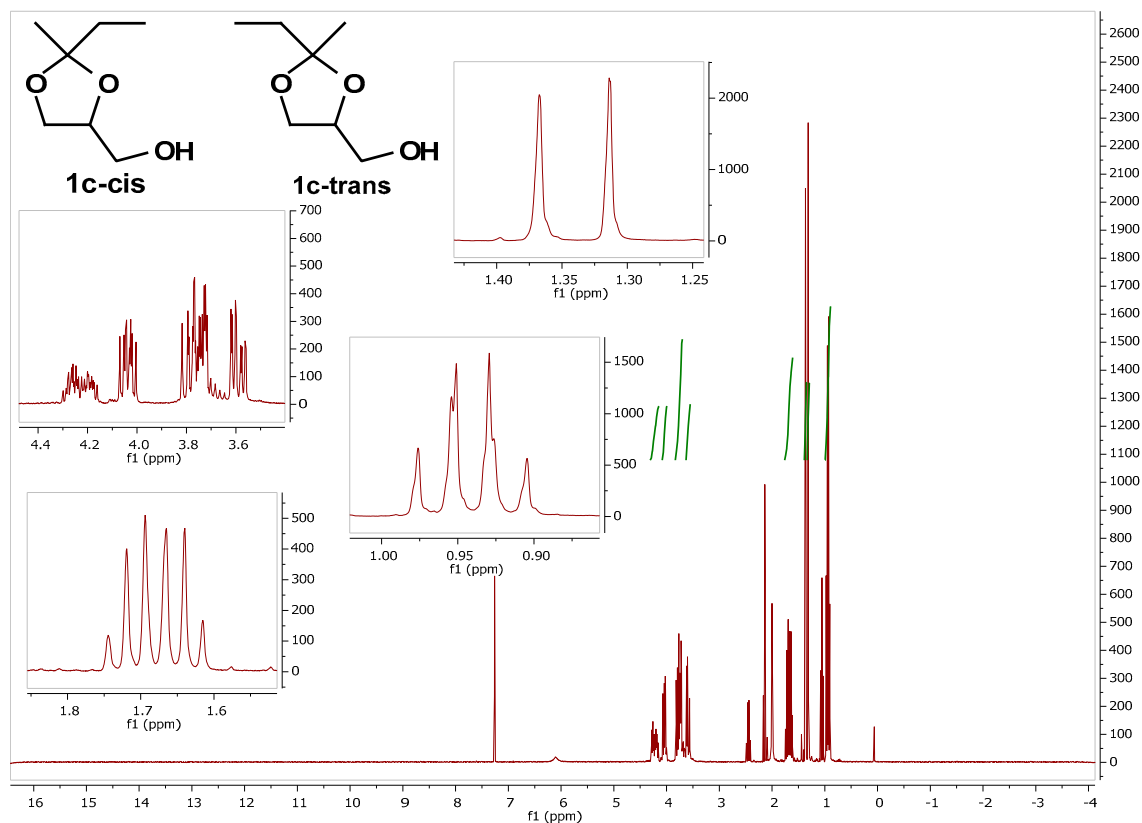**Figure S1.** <sup>1</sup>H NMR spectrum of 1c.

<sup>1</sup>H-NMR (300 MHz, CDCl<sub>3</sub>) δ (ppm): 4.25 (m, 2H), 4.12–4.00 (m, 2H), 3.85–3.72 (m, 4H), 3.61 (m, 2H), 1.79–1.62 (m, 4H), 1.39 (s, 3H), 1.33 (s, 3H), 0.96 (m, 6H).

The spectrum also showed traces of 2-butanone which corresponded to the following signals: <sup>1</sup>

<sup>1</sup>H-NMR (300 MHz, CDCl<sub>3</sub>) δ (ppm): 2.47 (q, *J* = 7.3 Hz, 2H), 2.15 (s, 3H), 1.07 (t, *J* = 7.3 Hz, 3H).

**<sup>13</sup>C NMR Spectrum of 1c (1:1 Mixture of cis and Trans Isomers)**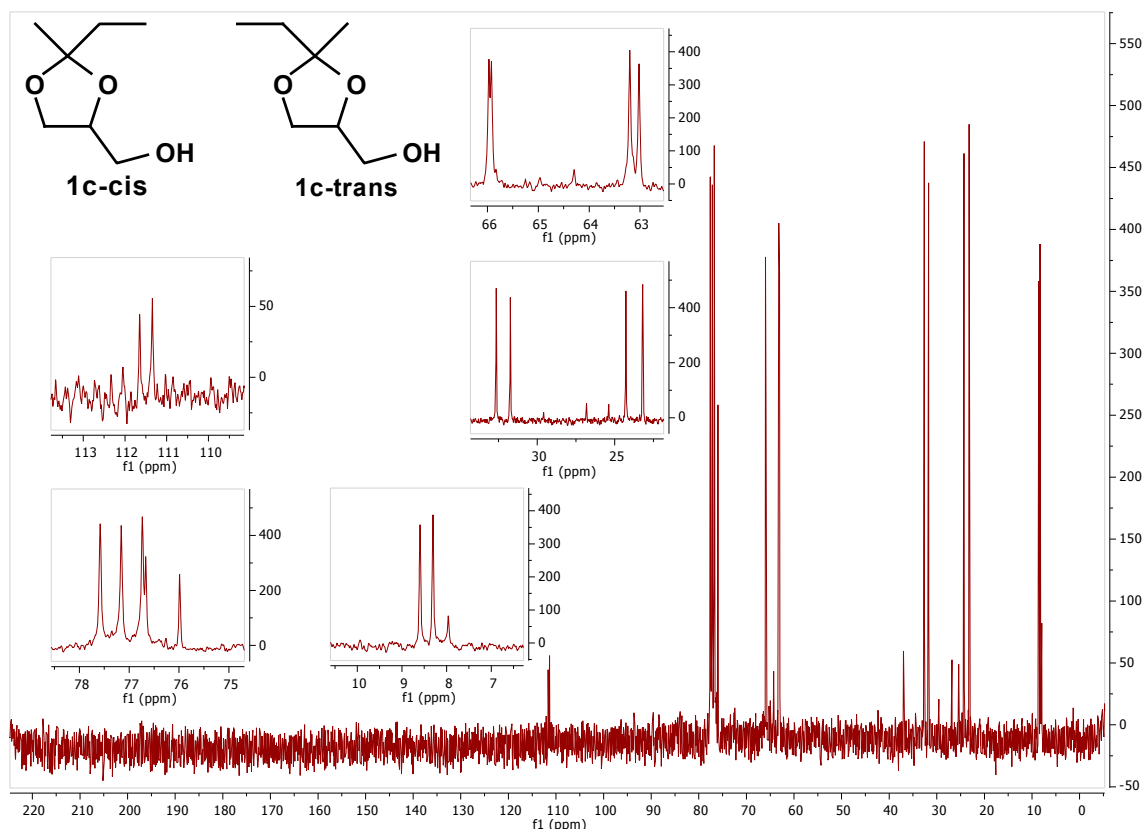Figure S2. <sup>13</sup>C NMR spectrum of 1c.

<sup>13</sup>C-NMR (75 MHz, CDCl<sub>3</sub>) δ (ppm): 111.91, 111.61, 76.93, 76.25, 66.23, 66.19, 63.49, 63.28, 32.90, 31.99, 24.54, 23.45, 8.86, 8.57.

The spectrum also showed traces of 2-butanone which corresponded to the following signals: <sup>1</sup>

<sup>13</sup>C-NMR (75 MHz, CDCl<sub>3</sub>) δ (ppm): 37.00, 29.59, 7.96.

**MS Spectrum of 1c (1:1 Mixture of cis and Trans Isomers)**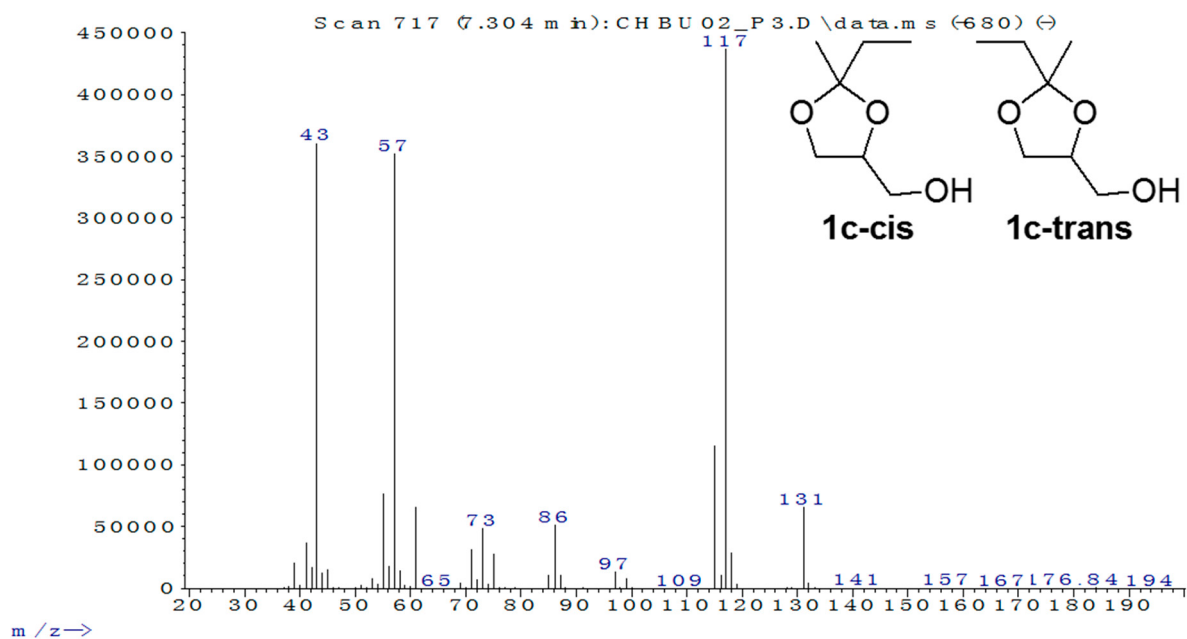

Figure S3. MS spectrum of 1c.

GC/MS (relative intensity, 70eV) m/z: 146 ( $M^+$ , <1%), 131 (20), 117 (100), 115 (27), 86 (11), 73 (11), 61 (14), 57 (84), 55 (18), 43 (80).

### MS Spectrum of 1c'

Figures S4 and S5 report MS spectra of the two minor products observed in the reaction of glycerol with 2-butanone. Signals are consistent with the structure of the following cyclic six-membered ring acetals:

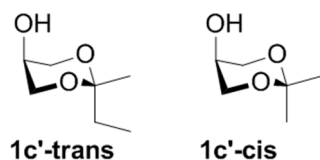

However, it is not possible to establish which isomer corresponds to which MS spectrum

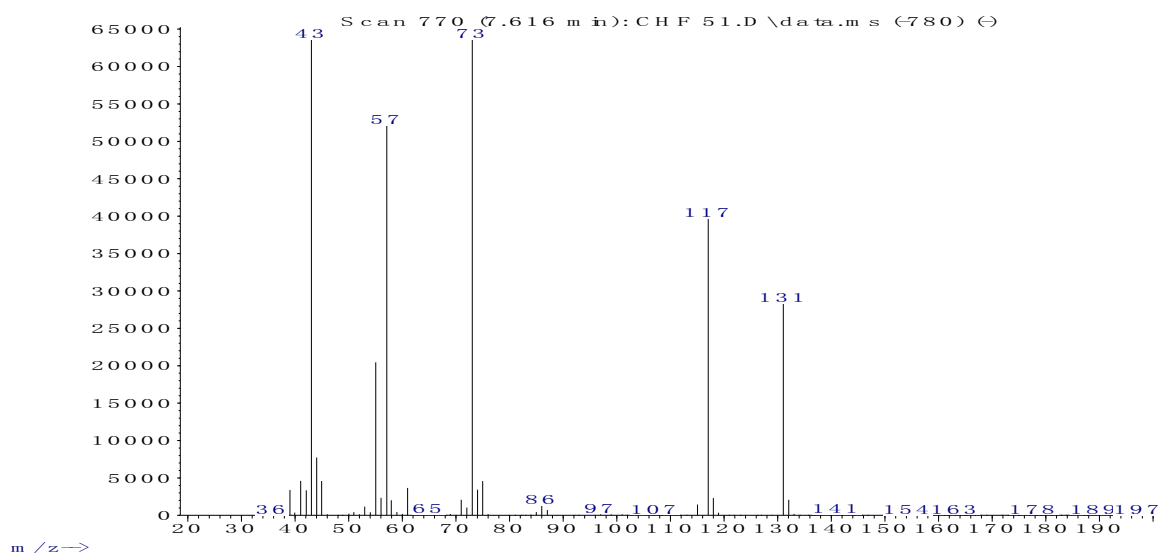

Figure S4. MS spectrum of 1c' (cis or trans).

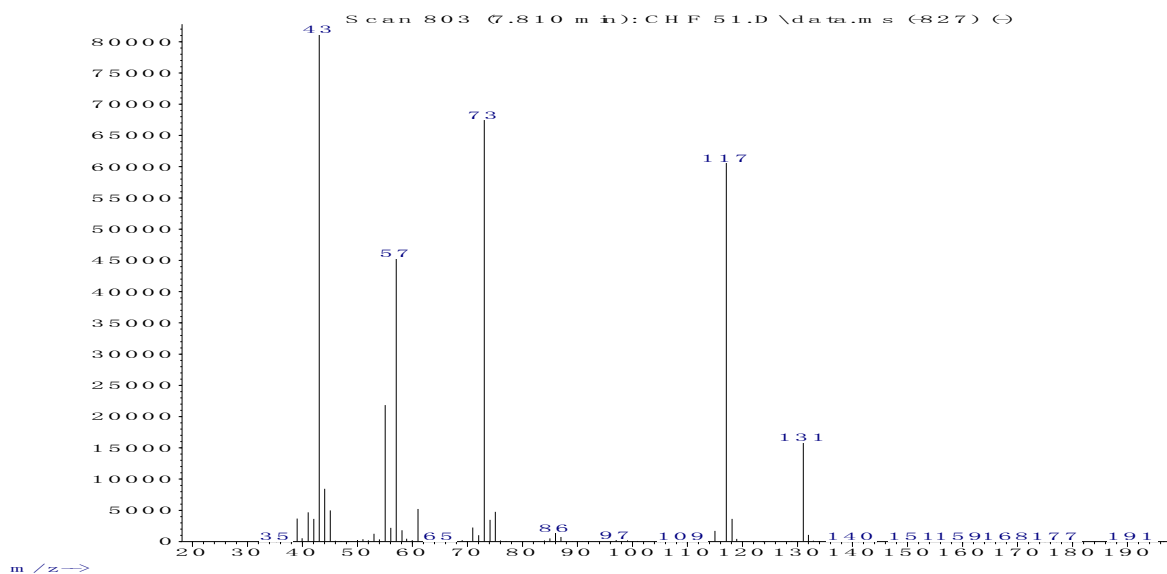

Figure S5. MS spectrum of 1c' (cis or trans).

GC/MS (relative intensity, 70eV) m/z:

**Figure S4:** 146 ( $M^+$ , <1%), 131 (43), 117 (61), 73 (99), 57 (80), 55 (31), 44 (12), 43 (100).

**Figure S5:** 146 ( $M^+$ , <1%), 131 (22), 117 (82), 73 (85), 57 (56), 55 (27), 44 (10), 43 (100).

## XRD Analysis

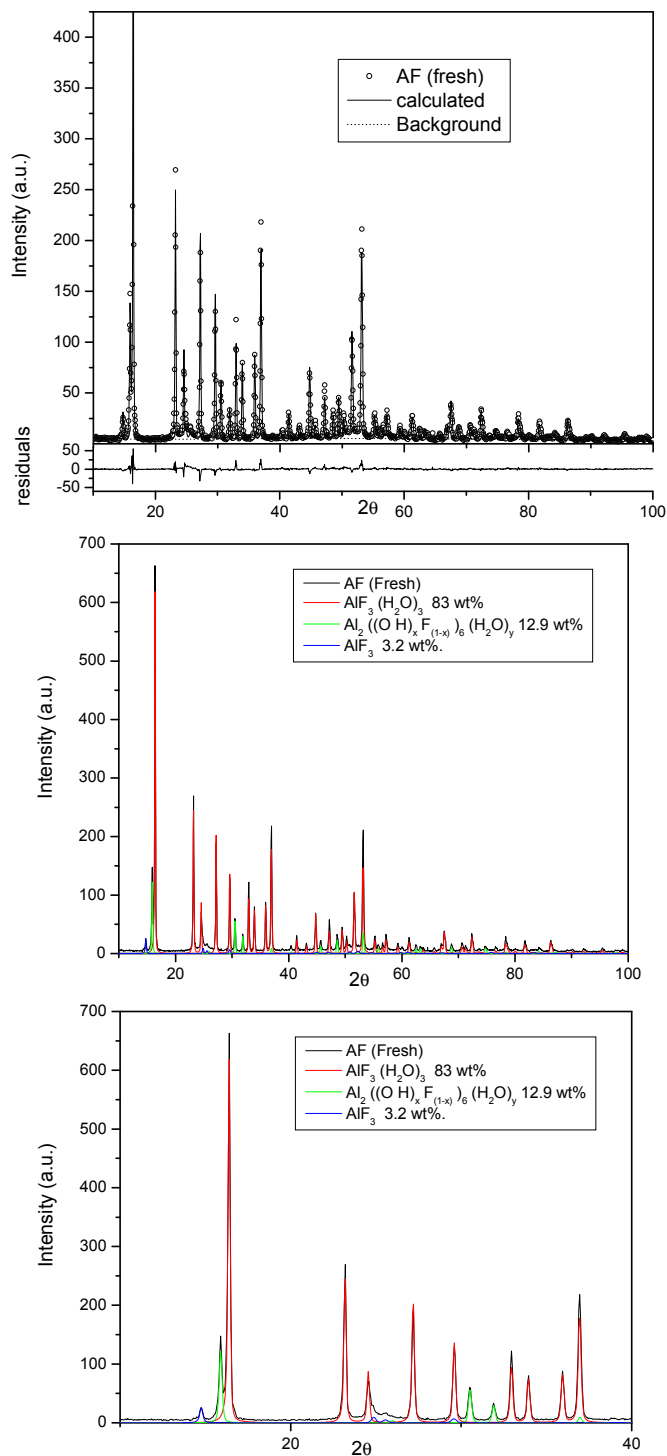

**Figure S1.** XRD pattern of commercial  $\text{AlF}_3 \cdot 3\text{H}_2\text{O}$  (Fresh, black pattern) compared with three reported different  $\text{AlF}_3$  phases (red, green and blue patterns).

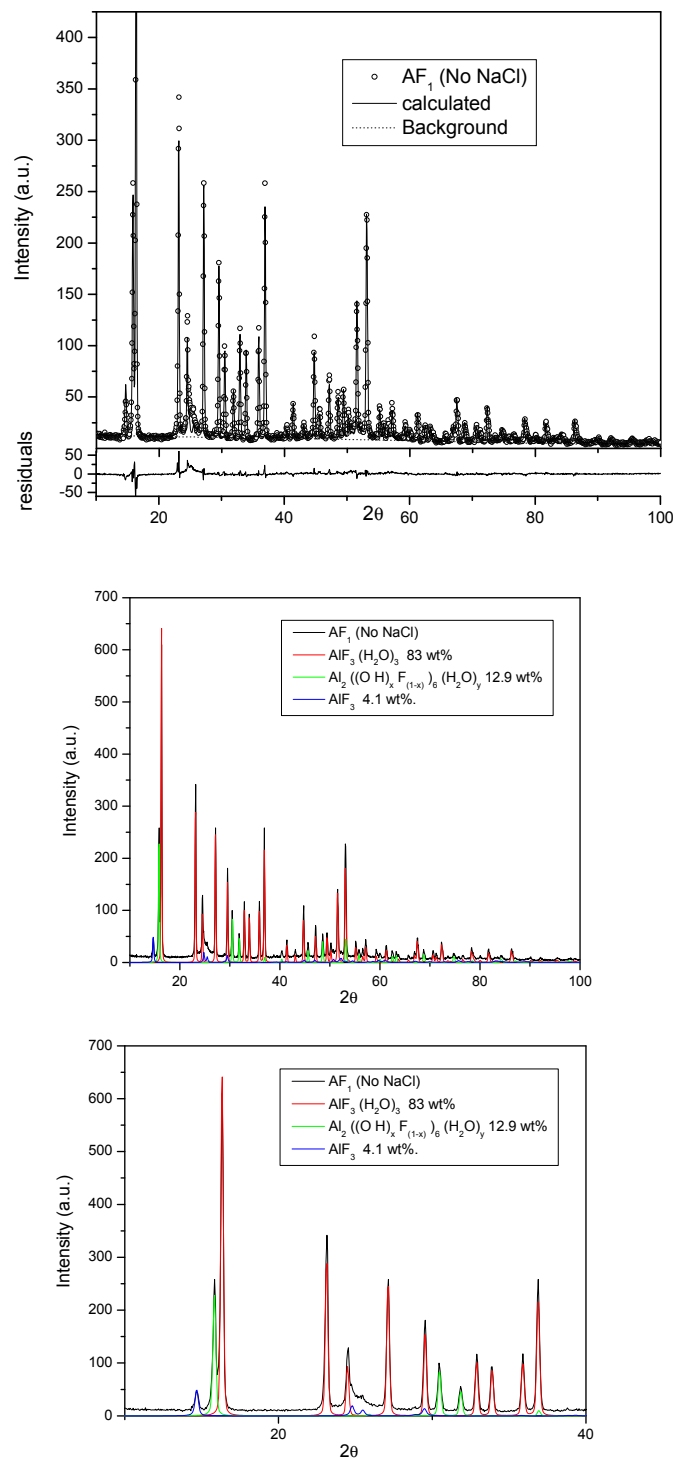

**Figure S2.** XRD pattern of  $AlF_3 \cdot 3H_2O$  used without sodium chloride (No NaCl, black profile) compared with XRD profiles of the three different phases present in the fresh AF sample (red, green and blue profiles).

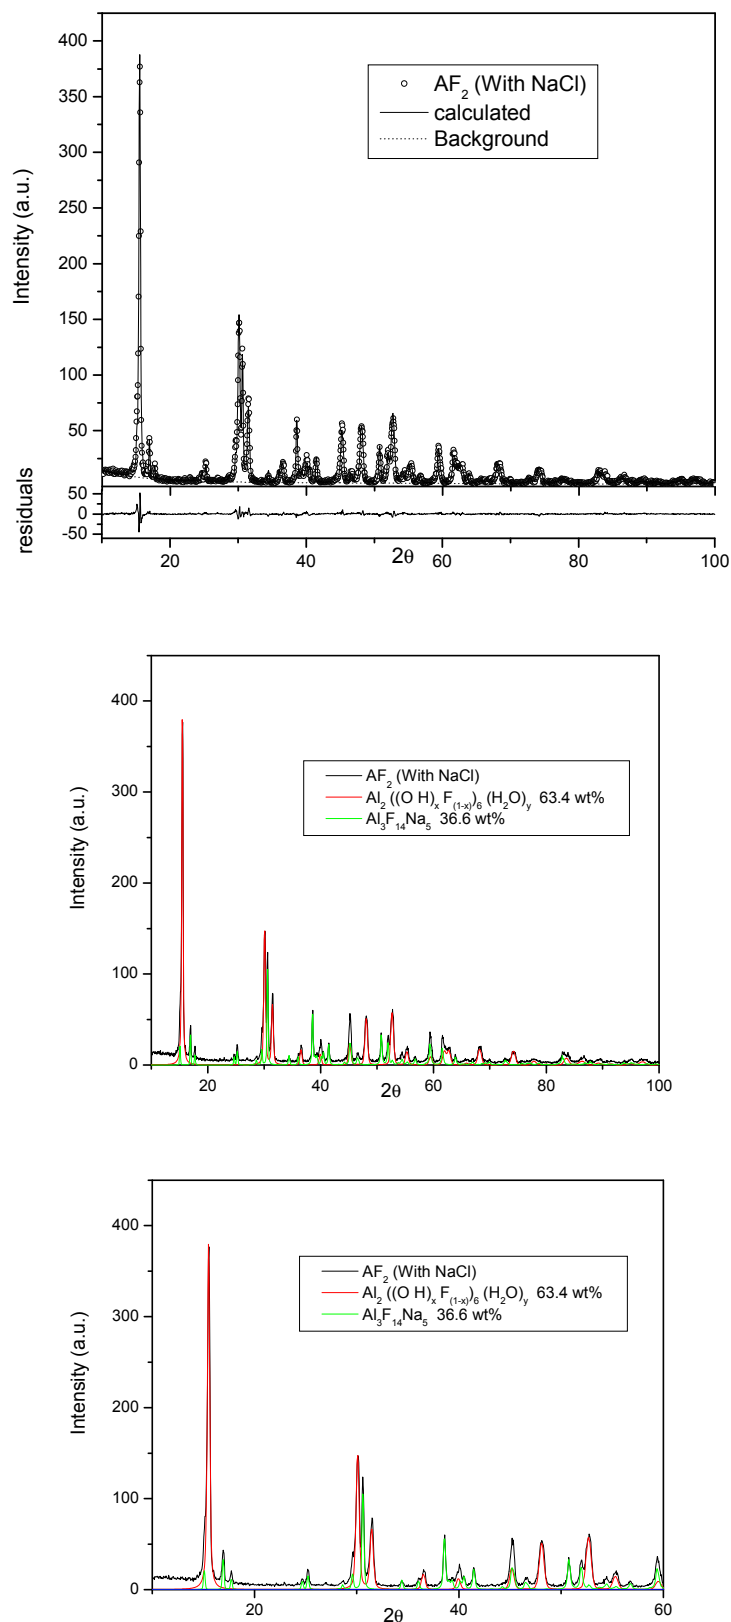

**Figure S3.** XRD pattern of  $\text{AlF}_3 \cdot 3\text{H}_2\text{O}$  used with sodium chloride (With NaCl, black profile) compared with XRD profiles of  $\text{Al}_2[(\text{F}_{1-x}(\text{OH})_x)_6(\text{H}_2\text{O})_y]$  and Chiolite ( $\text{Na}_5\text{Al}_3\text{F}_{14}$ ) phases (red and green profiles).

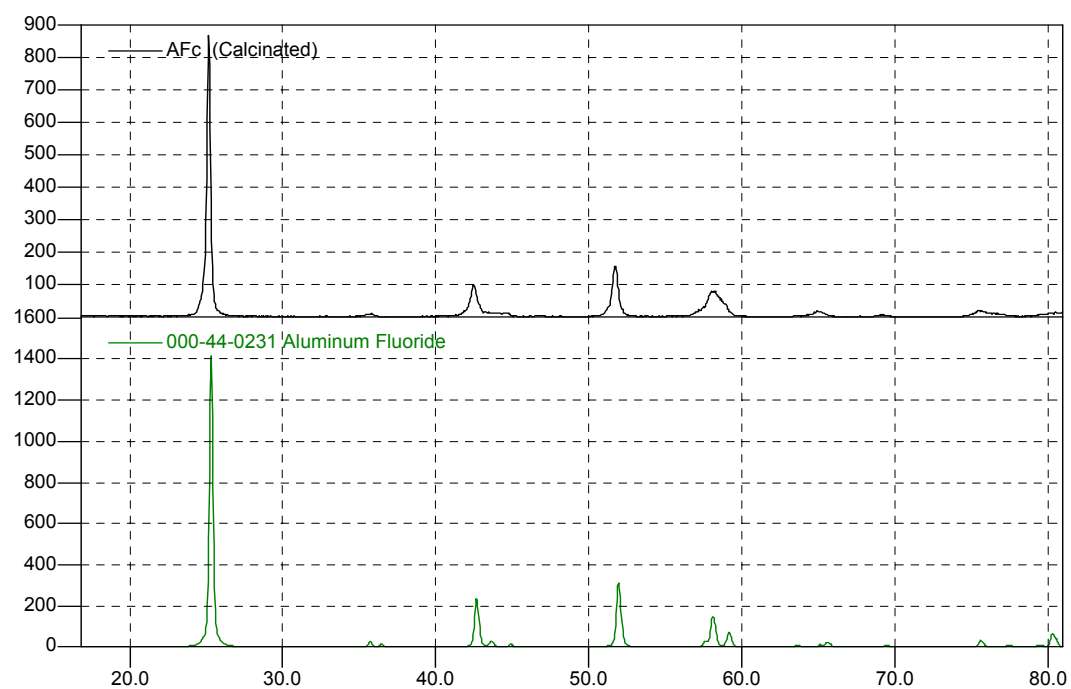

**Figure S4.** XRD pattern of calcined  $\text{AlF}_3 \cdot 3\text{H}_2\text{O}$  in air at 500 °C for 5 h (black) compared with the reported pattern of  $\alpha\text{-AlF}_3 \cdot 3\text{H}_2\text{O}$  (green).

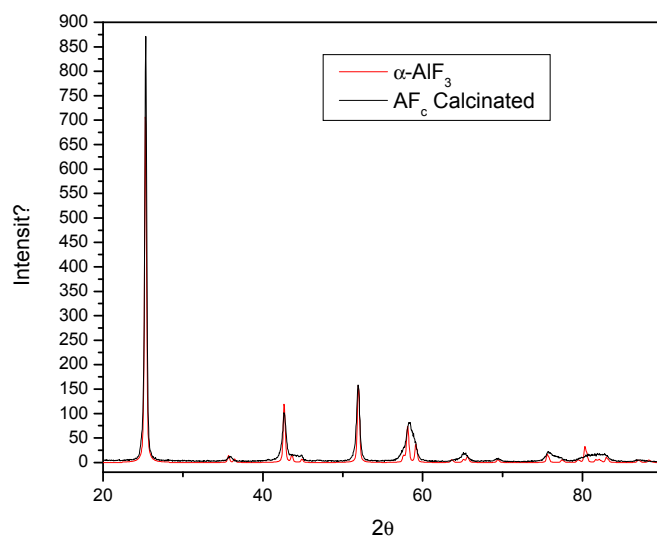

**Figure S5.** XRD pattern of commercial calcined  $\text{AlF}_3 \cdot 3\text{H}_2\text{O}$  in air at 500 °C for 5 h (black) compared with the reported  $\alpha\text{-AlF}_3$  pattern (red).

## References

- <sup>1</sup> Gottlieb, H.E.; Kotlyar, V.; Nudelman, A., NMR Chemical Shifts of Common Laboratories as Trace Impurities. *J. Org. Chem.* **1997**, *62*, 7512–7515.
